# Supplementary material for: Toxicity of 4-(Methylnitrosamino)-1-(3-pyridyl)-1-butanone (NKK) in early development: a wide-scope metabolomics assay in zebrafish embryos
Source: bioRxiv or medRxiv preprint supplement (doi:10.1101/2021.06.07.447361), 2021-06-07
Supplement: Supplementary file [file media-1.pdf]

## SUPPLEMENTARY INFORMATION

---

### **Toxicity of 4-(Methylnitrosamino)-1-(3-pyridyl)-1-butanone (NKK) in early development: a wide-scope metabolomics assay in zebrafish embryos**

**Carla Merino<sup>1,2,3</sup>, Marta Casado<sup>4</sup>, Benjamí Piña<sup>4</sup>, Maria Vinaixa<sup>\*1,2,3</sup>, Noelia Ramírez<sup>\*1,2,3</sup>**

1. Universitat Rovira i Virgili, Departament d'Enginyeria Electrònica, Elèctrica i Automàtica, Tarragona, Spain.
2. Institut d'Investigació Sanitària Pere Virgili, Tarragona, Spain.
3. CIBER de Diabetes y Enfermedades Metabólicas Asociadas (CIBERDEM), Instituto de Salud Carlos III, Madrid, Spain.
4. Department of Environmental Chemistry, Institute of Environmental Assessment and Water Research, Spanish Council for Scientific Research (IDAEA-CSIC), Barcelona, Spain.

**\*Corresponding authors:**

Noelia Ramírez, PhD  
IISPV-URV-CIBERDEM  
Av. Països Catalans, 26  
43007-Tarragona, Spain

Maria Vinaixa, PhD  
URV, Department of Electronic Engineering  
Av. Països Catalans, 26  
43007-Tarragona, Spain

**Table S1.** Parameters assessed to classify embryo phenotypes

| <b>Phenotype</b> | <b>Parameters*</b>                                                                                                                                                                       |
|------------------|------------------------------------------------------------------------------------------------------------------------------------------------------------------------------------------|
| Death embryos    | Non-viable embryos; coagulated embryos; lack of heartbeat; and death embryos/larvae.                                                                                                     |
| Severe phenotype | Lack of movement; malformation of eyes, head, mouth, and pectoral fins; modified chorda structure; no-hatched embryos; pericardial and yolk sac oedema; scoliosis; and yolk deformation. |
| Normal phenotype | Hatched embryos without any of the above commented phenotypic parameters.                                                                                                                |

\* The observation of a single parameter assigned the phenotype

**Table S2.** List of previously reported NNK metabolites (Dator et al., 2018; Hecht, 1998), their abbreviation, theoretical and empirical protonated mass [M+H], empirical retention time (t<sub>R</sub>), identification level (ID level), and source of LC-MS/MS data.

| Chemical name                                                                    | Abbreviation                 | Chemical formula                                                | Theoretical [M+H] | Empirical [M+H]  | Empirical t <sub>R</sub> (min) | ID level*             | MS/MS Refs.          |
|----------------------------------------------------------------------------------|------------------------------|-----------------------------------------------------------------|-------------------|------------------|--------------------------------|-----------------------|----------------------|
| 4-Hydroxy-1-(3-pyridyl)-1-butanone                                               | <b>HPB</b>                   | C <sub>9</sub> H <sub>11</sub> NO <sub>2</sub>                  | 166.0863          | 166.0867         | 4.83                           | <i>Not identified</i> | HMDB                 |
| 3-Hydroxy-1-(3-pyridyl)-1-butanol                                                | <b>1,3-Diol</b>              | C <sub>9</sub> H <sub>13</sub> NO <sub>2</sub>                  | 168.1019          | 168.1016         | 1.74                           | <i>Not identified</i> | (Dator et al., 2018) |
| 4-Hydroxy-1-(3-pyridyl)-1-butanol                                                | <b>1,4-Diol</b>              | C <sub>9</sub> H <sub>13</sub> NO <sub>2</sub>                  | 168.1019          | 168.1016         | 1.74                           | <i>Not identified</i> | (Dator et al., 2018) |
| 1,1-Diol                                                                         | <b>Unknown 1 (Diol 3)</b>    | C <sub>9</sub> H <sub>13</sub> NO <sub>2</sub>                  | 168.1019          | 168.1016         | 1.74                           | <i>Not identified</i> | (Dator et al., 2018) |
| 4-Oxo-4-(3-pyridyl)butyric acid                                                  | <b>OPBA</b>                  | C <sub>9</sub> H <sub>9</sub> NO <sub>3</sub>                   | 180.0655          | <i>Not found</i> | <i>Not found</i>               | -                     | -                    |
| 4-Hydroxy-4-(3-pyridyl)-butyric acid                                             | <b>HPBA</b>                  | C <sub>9</sub> H <sub>11</sub> NO <sub>3</sub>                  | 182.0812          | 182.0809         | 2                              | <b>1</b>              | STDR                 |
| 4-(Methylnitrosamino)-1-(3-pyridyl)-1-butanone                                   | <b>NNK</b>                   | C <sub>10</sub> H <sub>13</sub> N <sub>3</sub> O <sub>2</sub>   | 208.1081          | 208.1078         | 5.87                           | <b>1</b>              | STDR                 |
| 4-(Methylnitrosamino)-1-(3-pyridyl)-1-butanol                                    | <b>NNAL</b>                  | C <sub>10</sub> H <sub>15</sub> N <sub>3</sub> O <sub>2</sub>   | 210.1237          | 210.1228         | 4.7                            | <i>Not identified</i> | STDR                 |
| 4-(Methylnitrosamino)-1-[3-(6-hydroxypyridyl)-1-butanone                         | <b>6-OH NNK</b>              | C <sub>10</sub> H <sub>13</sub> N <sub>3</sub> O <sub>3</sub>   | 224.103           | <i>Not found</i> | <i>Not found</i>               | -                     | -                    |
| 4-[Methyl(nitrosoamino)-1-(1-oxido-3-pyridinyl)-1-butanone                       | <b>NNK-N-oxide</b>           | C <sub>10</sub> H <sub>13</sub> N <sub>3</sub> O <sub>3</sub>   | 224.103           | <i>Not found</i> | <i>Not found</i>               | -                     | -                    |
| <i>N</i> -(3,4-Dihydroxy-4-(pyridin-3-yl)butyl)- <i>N</i> -methylnitrosous amide | <b>γ-OH NNAL (OH-NNAL 2)</b> | C <sub>10</sub> H <sub>15</sub> N <sub>3</sub> O <sub>3</sub>   | 226.1186          | 226.1187         | 5.18                           | <i>Not identified</i> | (Dator et al., 2018) |
| 4-(Methylnitrosamino)-1-(3-pyridyl- <i>N</i> -oxide)-1-butanol                   | <b>NNAL-N-oxide</b>          | C <sub>10</sub> H <sub>15</sub> N <sub>3</sub> O <sub>3</sub>   | 226.1186          | 226.1187         | 5.18                           | <b>2</b>              | (Dator et al., 2018) |
| -                                                                                | <b>Unknown 2 (OH-NNAL 1)</b> | C <sub>10</sub> H <sub>15</sub> N <sub>3</sub> O <sub>3</sub>   | 226.1186          | 226.1187         | 5.18                           | <i>Not identified</i> | (Dator et al., 2018) |
| 3-(4-(Methyl(nitro)amino)butanoyl)pyridine 1-oxide                               | <b>nitro-NK-N-oxide</b>      | C <sub>10</sub> H <sub>13</sub> N <sub>3</sub> O <sub>4</sub>   | 240.0979          | 240.0981         | 5.18                           | <i>Not identified</i> | (Dator et al., 2018) |
| 3-(1-Hydroxy-4-(methyl(nitro)amino)butyl)pyridine 1-oxide                        | <b>nitro-NAL-N-oxide</b>     | C <sub>10</sub> H <sub>15</sub> N <sub>3</sub> O <sub>4</sub>   | 242.1135          | <i>Not found</i> | <i>Not found</i>               | -                     | -                    |
| -                                                                                | <b>Unknown 3</b>             | -                                                               | 254.1135          | <i>Not found</i> | <i>Not found</i>               | -                     | -                    |
| <i>N</i> -acetylcysteine-PHB 1                                                   | <b>NAC-PHB 1</b>             | C <sub>14</sub> H <sub>20</sub> N <sub>2</sub> O <sub>4</sub> S | 313.1216          | 313.1212         | 5.22                           | <i>Not identified</i> | (Dator et al., 2018) |
| <i>N</i> -acetylcysteine-PHB 2                                                   | <b>NAC-PHB 2</b>             | C <sub>14</sub> H <sub>20</sub> N <sub>2</sub> O <sub>4</sub> S | 313.1216          | 313.1212         | 5.22                           | <i>Not identified</i> | (Dator et al., 2018) |
| <i>N</i> -acetylcysteine-PHB 3                                                   | <b>NAC-PHB 3</b>             | C <sub>14</sub> H <sub>20</sub> N <sub>2</sub> O <sub>4</sub> S | 313.1216          | 313.1212         | 5.22                           | <i>Not identified</i> | (Dator et al., 2018) |

|                                                                                                                    |                              |                                                               |          |                  |                  |                       |                      |
|--------------------------------------------------------------------------------------------------------------------|------------------------------|---------------------------------------------------------------|----------|------------------|------------------|-----------------------|----------------------|
| 4-Hydroxy-1-(3-pyridyl)-1-butanone glucuronide                                                                     | <b>HPB-Gluc</b>              | C <sub>15</sub> H <sub>19</sub> NO <sub>8</sub>               | 342.1183 | <i>Not found</i> | <i>Not found</i> | -                     | -                    |
| 4-(Methylnitrosamino)-1-(3-pyridyl)-1-butanol-O-glucuronide                                                        | <b>NNAL-O-Gluc</b>           | C <sub>16</sub> H <sub>23</sub> N <sub>3</sub> O <sub>8</sub> | 386.1558 | <i>Not found</i> | <i>Not found</i> | -                     | -                    |
| 3,4,5-trihydroxy-6-((nitroso(4-oxo-4-(pyridin-3-yl)butyl)amino)methoxy)tetrahydro-2H-pyran-2-carboxylic acid       | <b>α-OH-methyl-NNK-Gluc</b>  | C <sub>16</sub> H <sub>21</sub> N <sub>3</sub> O <sub>9</sub> | 400.1351 | <i>Not found</i> | <i>Not found</i> | -                     | -                    |
| 3,4,5-Trihydroxy-6-(((4-hydroxy-4-(pyridin-3-yl)butyl)(nitroso)amino)methoxy)tetrahydro-2H-pyran-2-carboxylic acid | <b>α-OH-methyl-NNAL-Gluc</b> | C <sub>16</sub> H <sub>23</sub> N <sub>3</sub> O <sub>9</sub> | 402.1507 | 402.1492         | 5.03             | <i>Not identified</i> | (Dator et al., 2018) |

\* Identification level according to Schymanski et al. (Schymanski et al., 2014). Identification was performed by matching the empirical MS/MS spectra with the MS/MS of NNK metabolites pure chemical standards (STDR) (Level 1). When pure chemical standards were not available, annotation was performed by comparing the empirical MS/MS spectra with the MS/MS spectra available in the HMDB (Wishart et al., 2018) or in the literature (Dator et al., 2018) (level 2). *Not found*: NNK metabolites are those whose empirical protonated mass was not within 5 ppm mass error. *Not identified*: NNK metabolites are those whose empirical MS/MS spectra did not match with the MS/MS spectra of NNK metabolites pure chemical standards, databases, or literature. *Unknow*: compounds are novel NNK metabolites described by Dator et al. (Dator et al., 2018).

## REFERENCES

- Dator, R., Von Weyarn, L.B., Villalta, P.W., Hooyman, C.J., Maertens, L.A., Upadhyaya, P., Murphy, S.E., Balbo, S., 2018. In Vivo Stable-Isotope Labeling and Mass-Spectrometry-Based Metabolic Profiling of a Potent Tobacco-Specific Carcinogen in Rats. *Anal. Chem.* 90, 11863–11872. <https://doi.org/10.1021/acs.analchem.8b01881>
- Hecht, S.S., 1998. Biochemistry, Biology, and Carcinogenicity of Tobacco-Specific N-Nitrosamines. *Chem. Res. Toxicol.* 11, 559–603. <https://doi.org/10.1021/TX980005Y>
- Schymanski, E.L., Jeon, J., Gulde, R., Fenner, K., Ruff, M., Singer, H.P., Hollender, J., 2014. Identifying small molecules via high resolution mass spectrometry: Communicating confidence. *Environ. Sci. Technol.* <https://doi.org/10.1021/es5002105>
- Wishart, D.S., Feunang, Y.D., Marcu, A., Guo, A.C., Liang, K., Vázquez-Fresno, R., Sajed, T., Johnson, D., Li, C., Karu, N., Sayeeda, Z., Lo, E., Assempour, N., Berjanskii, M., Singhal, S., Arndt, D., Liang, Y., Badran, H., Grant, J., Serra-Cayuela, A., Liu, Y., Mandal, R., Neveu, V., Pon, A., Knox, C., Wilson, M., Manach, C., Scalbert, A., 2018. HMDB 4.0: The human metabolome database for 2018. *Nucleic Acids Res.* 46, D608–D617. <https://doi.org/10.1093/nar/gkx1089>
